# Supplementary material
Source: PubMed Central journal article supplement (PMC1560246)
Supplement: rspb20053307s02.pdf [file rspb20053307s02.pdf]

Appendix Table 1. Registration numbers and specimen label data associated with the Natural History Museum (NHM) fossils used in this paper. The original locality, age and identification information are re-interpreted in the paper.

| specimen          | location on label       | country | dating on label                       | original NHM identification           |
|-------------------|-------------------------|---------|---------------------------------------|---------------------------------------|
| R2209             | Auvers                  | France  | Eocene, (Mid.Gervillei) Sables Moyens | <i>Madrepora solanderi</i> (Defrance) |
| R54910            | No Information          | France  | Eocene ?                              | <i>Acropora</i> sp.                   |
| R54912            | Brockenhurst, Hampshire | England |                                       |                                       |
| R1920<br>5 pieces | Auvers                  | France  | Eocene, Gervillei                     | <i>Acropora</i> sp.                   |
| R40382            | La Ferme de l'Orme      | France  | Eocene                                | <i>Acropora ornata</i> (Defrance)     |
| R40383            | La Ferme de l'Orme      | France  | Eocene                                | <i>Acropora ornata</i> (Defrance)     |
| R40384            | La Ferme de l'Orme      | France  | Eocene                                | <i>Acropora ornata</i> (Defrance)     |
| R40385            | La Ferme de l'Orme      | France  | Eocene                                | <i>Acropora ornata</i> (Defrance)     |
| R52066            | Chambors                | France  | Eocene, Upper Calcaire Grossier       | <i>Acropora</i> sp.                   |
| R18266            | Auvers                  | France  | Eocene, Lower Bartonian Sables Moyens | <i>Acropora solanderi</i> (Defrance)  |
| R54911            | No information          | France  | Eocene?                               | <i>Acropora</i> sp.                   |
| R55689            | Auvers                  | France  | Middle Eocene                         | <i>Acropora deformis</i> (Michelin)   |
| R2209             | Auvers                  | France  | Eocene Gervillei Sable Moyen          | <i>Acropora solanderi</i> (Defrance)  |
| R35320            | No information          | France  | Eocene?                               | <i>Acropora solanderi</i> (Defrance)  |
| R45675            | Auvers-sur-Oise         | France  | Eocene                                | <i>Acropora solanderi</i> (Defrance)  |
| R45676            | Auvers-sur-Oise         | France  | Eocene                                | <i>Acropora solanderi</i> (Defrance)  |
| R45677            | Auvers-sur-Oise         | France  | Eocene                                | <i>Acropora solanderi</i> (Defrance)  |
| R45678            | Auvers-sur-Oise         | France  | Eocene                                | <i>Acropora solanderi</i> (Defrance)  |
| R45679            | Auvers-sur-Oise         | France  | Eocene                                | <i>Acropora solanderi</i> (Defrance)  |
| R52065            | Chambors                | France  | Eocene, Upper Calcaire Grossier       | <i>Acropora</i> sp.                   |
| R52067            | Chambors                | France  | Eocene, Upper Calcaire Grossier       | <i>Acropora</i> sp.                   |
| R54831            | Paris Basin             | France  | Eocene                                | <i>Acropora solanderi</i> (Defrance)  |
| R54832            | Paris Basin             | France  | Eocene                                | <i>Acropora solanderi</i> (Defrance)  |
| R54833            | Paris Basin             | France  | Eocene                                | <i>Acropora solanderi</i> (Defrance)  |
| R54838            | Paris                   | France  | Eocene                                | <i>Madrepora solanderi</i> (Defrance) |
| R54849            | Paris Basin             | France  | Middle Eocene                         | <i>Acropora solanderi</i> (Defrance)  |
| R54861            | Auvers                  | France  | Eocene, Sables Moyens                 | <i>Acropora solanderi</i> (Defrance)  |
| 49583             | Brockenhurst, Hampshire | England | Eocene, Mid-Headon Beds               | <i>Madrepora</i> sp.                  |
| R18216            | Brockenhurst, Hampshire | England | Eocene, Mid-Headon Beds               | <i>Madrepora solanderi</i> (Defrance) |
| R18217            | Brockenhurst, Hampshire | England | Eocene, Mid-Headon Beds               | <i>Madrepora solanderi</i> (Defrance) |
| R14571            | Barton, Hampshire       | England | Eocene, Barton Beds                   | <i>Dendrophyllia</i> sp.              |

|                   |                              |         |                                       |                                                             |
|-------------------|------------------------------|---------|---------------------------------------|-------------------------------------------------------------|
| R19125            | Barton, Hampshire            | England | Eocene, Barton Beds                   | <i>Dendrophyllia dendrophylloides</i> Milne-Edwards & Haime |
| R29687            | Barton, Hampshire            | England | Eocene, Barton Beds                   | <i>Acropora (Madrepora) solanderi</i> (Defrance)            |
| R54837            | Paris                        | France  | Eocene                                | <i>Madrepora solanderi</i> (Defrance)                       |
| R54838            | Paris                        | France  | Eocene                                | <i>Madrepora solanderi</i> (Defrance)                       |
| R54839            | Paris                        | France  | Eocene                                | <i>Madrepora solanderi</i> (Defrance)                       |
| R54913            | Brockenhurst, Hampshire      | England | Oligocene                             | <i>Madrepora</i> sp.                                        |
| R54914            | Brockenhurst, Hampshire      | England | Oligocene                             | <i>Madrepora</i> sp.                                        |
| 49583<br>2 pieces | Brockenhurst, Hampshire      | England | Eocene, Middle Headon Beds            | <i>Madrepora</i> sp.                                        |
| R2339             | Brockenhurst, Hampshire      | England | Eocene                                | <i>Madrepora</i> sp.                                        |
| R45678            | Auvers-sur-oise              | France  | Eocene                                | <i>Acropora solanderi</i> (Defrance)                        |
| R18265            | Auvers                       | France  | Eocene, Lower Bartonian Sables Moyens | <i>Acropora solanderi</i> (Defrance)                        |
| R54842            | No information               | France  | Middle Eocene                         | <i>Acropora solanderi</i> (Defrance)                        |
| R54844            | No information               | France  | Middle Eocene                         | <i>Acropora solanderi</i> (Defrance)                        |
| R19126            | Barton, Hampshire            | England | Eocene, Barton Beds                   | <i>Acropora</i> sp.                                         |
| R28205            | Barton Cliffs, Barton        | England | Eocene, Barton Beds                   | <i>Acropora solanderi</i> (Defrance)                        |
| R40720            | Whitecliff Bay Isle of Wight | England | Eocene                                | <i>Acropora solanderi</i> (Defrance)                        |
| R40721            | Whitecliff Bay Isle of Wight | England | Eocene                                | <i>Acropora solanderi</i> (Defrance)                        |
| R49389            | Barton, Hampshire            | England | Eocene, Horizon H2                    | <i>Acropora</i> sp.                                         |
| R52051            | Chambors                     | France  | Eocene, Upper Calcaire Grossier       | <i>Acropora</i> sp.                                         |
| R54848            | Paris Basin                  | France  | Middle Eocene                         | <i>Acropora solanderi</i> (Defrance)                        |
| R54915            | Barton Cliffs Hampshire      | England | Upper Eocene                          |                                                             |

Appendix 2. Species group identifications, most similar species, character measurements and descriptions for all fossils indicated in Appendix Table 1. rc, radial corallites.

| species group      | most similar extant sp. | specimen | general description of specimen                                                                                                                                                  | branch thickness (mm) | radial corallites                                                                                                                         | walls & coenosteum                                                                |
|--------------------|-------------------------|----------|----------------------------------------------------------------------------------------------------------------------------------------------------------------------------------|-----------------------|-------------------------------------------------------------------------------------------------------------------------------------------|-----------------------------------------------------------------------------------|
| <i>humilis I</i>   | <i>digitifera</i>       | R54843   | Nine branchlets, one showing evidence of a tip, apparently terete, overall length of 42mm, evidence of digitate growth                                                           | 6, 8                  | Mixed sizes, mostly not touching, show thickened wall                                                                                     | Some evidence of costate rc wall, coenosteum between walls reticulate             |
| <i>humilis I</i>   | <i>digitifera</i>       | R2209a   | Horizontal fragment with four branches, one of these is a short terete branchlet, overall length of 25mm                                                                         | 10                    | Mixed sizes, mostly not touching except on branchlet, no rc sufficiently developed to indicate shape                                      | Intercorallite coenosteum reticulate                                              |
| <i>humilis I</i>   | <i>digitifera</i>       | R54910   | Nine plus branches, all broken, overall length of 50mm, branches arising from basal region indicating corymbose growth                                                           | 6                     | All corallites abraded, but indications of appressed structure with round opening, evenly sized and distributed radials, some rc touching | Dense costate wall, dense reticulo-costate between corallites                     |
| <i>humilis Ii</i>  | <i>globoiceps</i>       | R54912   | Five branches indicate very short digitate branching from base, overall length of 35mm                                                                                           | 5                     | Very abraded, appressed crowded corallites, same size                                                                                     | Indications of dense reticulo-costate coenosteum on & between radials             |
| <i>latistella</i>  | <i>aculeus</i>          | R40382   | Piece of gracile branches, overall length of 10mm                                                                                                                                | 4                     | Not very abraded, rc not touching, same size, partially tubular appressed                                                                 |                                                                                   |
| <i>latistella</i>  | <i>aculeus</i>          | R40383   | Piece of gracile branches, overall length of 10mm                                                                                                                                | 4                     | With round openings                                                                                                                       | Coenosteum costate, intercorallite broken costate or reticulate                   |
| <i>latistella</i>  | <i>aculeus</i>          | R40384   | Piece of gracile branches, overall length of 9mm                                                                                                                                 | 3                     |                                                                                                                                           |                                                                                   |
| <i>latistella</i>  | <i>aculeus</i>          | R40385   | Piece of gracile branches, overall length of 12mm                                                                                                                                | 3                     |                                                                                                                                           |                                                                                   |
| <i>loveli</i>      | <i>glauca</i>           | R18266   | Two short branchlets, evidence of a branch tip and three other broken branches, evidence of terete branches, overall length of 50mm, most likely colony shape digitate/corymbose | 6                     | Mixed sizes, some touching                                                                                                                | Evidence from three or four corallites of a thickened rc wall                     |
| <i>loveli</i>      | <i>glauca</i>           | R54911   | One group of six branchlets and a second single branchlet at least two branchlets showing indications of being short, overall length of 36mm, evidence of terete branches        | 3, 12                 | One rc well developed, not touching, appressed tubular structure                                                                          | Coenosteum between radials mostly reticulate, evidence of costate radial wall     |
| <i>loveli</i>      | <i>glauca</i>           | R55689   | Groups of branchlets arising together evidence from at least two branchlets that they are short, overall length of 35mm, evidence of terete branches                             | 6, 12                 | Same size, mostly not touching, evidence from one rc of an                                                                                | Evidence from three rc of a thickened wall                                        |
| <i>cervicornis</i> | <i>prolifera?</i>       | R2209b   | Fragment of branch with one broken branchlet , overall length of 24mm                                                                                                            | 6                     | Mostly one size, not touching, very abraded                                                                                               | Rc walls costate, intercorallite reticulate                                       |
| <i>cervicornis</i> | <i>prolifera</i>        | R35320   | Joint' area with eight branches coming off a common branch, overall length of 43mm                                                                                               | 8, 14                 | One size or a mixture, spacing consistent with <i>prolifera</i> sp.                                                                       | No rc walls discernable, indications of costate rc wall                           |
| <i>cervicornis</i> | <i>prolifera</i>        | R45675   | One broken branch with two incipient branches coming off at different places, overall length of 29mm                                                                             | 9                     | Mixed sizes or one size, not touching                                                                                                     | No evidence of rc walls, coenosteum between rc reticulate                         |
| <i>cervicornis</i> | <i>prolifera?</i>       | R45676   | Fragment of branch broken through center with one branchlet just forming, overall length of 29mm                                                                                 | 9                     | One size, open tubular                                                                                                                    | Not discernable rc walls, intercorallite reticulate                               |
| <i>muricata</i>    | <i>pharaonis</i>        | R45677   | Fragment of branch, four branchlets coming from one side, overall length of 27mm                                                                                                 | 8                     | Mixed sizes, mostly not touching, tubular appressed with round openings                                                                   | Walls can be detected in six of them, rc walls costate, intercorallite reticulate |
| <i>hyacinthus</i>  | <i>hyacinthus</i>       | R45679   | Small fragment with at least five branches arising closely together, overall length of 20mm                                                                                      |                       | Broken branches show lipped corallites arranged close together in a "rosette"                                                             | Rc walls costate, intercorallite reticulate                                       |
| <i>cervicornis</i> | <i>prolifera</i>        | R52067   | Small branch badly abraded, three half branches proliferating from tip, overall length of 28mm                                                                                   | 10                    | Mixed sizes or one size, rc not touching                                                                                                  | No evidence of rc walls, coenosteum between rc reticulate                         |

|                    |                   |        |                                                                                                                                                                                                                                          |            |                                                                                                                              |                                                                                                                                         |
|--------------------|-------------------|--------|------------------------------------------------------------------------------------------------------------------------------------------------------------------------------------------------------------------------------------------|------------|------------------------------------------------------------------------------------------------------------------------------|-----------------------------------------------------------------------------------------------------------------------------------------|
| <i>cervicornis</i> | <i>prolifera?</i> | R54831 | Fragment of branch with two broken branches coming off at acute angle, overall length of 40mm                                                                                                                                            | 5, 6       | Mixed sizes , some touching                                                                                                  | Severely abraded                                                                                                                        |
| <i>muricata</i>    | <i>pharaonis?</i> | R54832 | Fragment of branch forking into three complete branchlets, including axial corallites tips, abraded around tip, overall length of 35mm                                                                                                   | 5, 7       | Two sizes, mixed sizes, mostly heavily abraded, appressed tubular, probably with lip                                         | Rc wall costate/broken costate or reticulate intercorallite coenosteum                                                                  |
| <i>cervicornis</i> | <i>prolifera?</i> | R54833 | Fragment of branch, forking to another branch at its base, forking again at tops, each branched forks are broken, but the basal one has another branchlet which is not broken with one ring of radial corallites, overall length of 40mm | 7          | Mixed sizes, not touching                                                                                                    | Severely abraded                                                                                                                        |
| <i>cervicornis</i> | <i>prolifera?</i> | R54838 | Fragment with joint, with five branches coming off, all broken, overall length of 35mm                                                                                                                                                   | 6, 8       | Mixed sizes, not touching, scattered                                                                                         | Severely abraded                                                                                                                        |
| <i>hyacinthus</i>  | <i>hyacinthus</i> | R54849 | Fragment of branch with one fork at tip, fork branches are broken, other forking again another branch coming off at base, overall length of 52mm, branch slightly flattened                                                              | 7, 11, 13  | Mixed sizes, mostly not touching                                                                                             | Severely abraded                                                                                                                        |
| <i>cervicornis</i> | <i>prolifera?</i> | R54861 | Fragment of branch with one broken branchlet on each side, overall length of 39mm                                                                                                                                                        | 6, 7       | Mixed sizes, not touching                                                                                                    | Severely abraded                                                                                                                        |
| <i>muricata</i>    | <i>pharaonis</i>  | R52065 | Very abraded and bioeroded, overall length of 26mm, very similar to 54837/54839                                                                                                                                                          | 6          |                                                                                                                              |                                                                                                                                         |
| <i>muricata</i>    | <i>pharaonis</i>  | 49583  | Joint area with six branchlets coming off at a common branch, some with small branches coming off on them, five branches broken across, three small branchlets unbroken, overall length of 25mm                                          | 9          | Mixed sizes, very abraded, tubular appressed with round openings or exert tubular with round openings, mostly not touching   | At least four rc with walls clearly visible, rc walls costate, intercorallite walls reticulate                                          |
| <i>muricata</i>    | <i>pharaonis</i>  | R18216 | Joint area with three branches coming off at a common branch, all broken, overall length of 47mm                                                                                                                                         | 14         | Mixed sizes, mostly two sizes, touching, very abraded, corallites tubular with round openings                                | One area between two branches shows corallite with partial walls, rc walls costate, intercorallite area reticulate                      |
| <i>muricata</i>    | <i>pharaonis</i>  | R18217 | Section of branch, evidence of one branch right down to its base, overall length of 56mm                                                                                                                                                 | 13         | Mixed size of large and small, some touching                                                                                 | Severely abraded                                                                                                                        |
| <i>muricata</i>    | <i>pharaonis</i>  | R14571 | Fragment of main branch. Joint area with six broken branches, subequal distance from all around branches. Indication that there are branchlets instead of branches, overall length of 40mm                                               | 9          | Mixed sizes, not touching. Some tubular appressed with round openings, others apparently tubular exert with round openings   | Rc walls clearly visible in three corallites, rc wall costate, intercorallite walls reticulate in some places, broken costate in others |
| <i>muricata</i>    | <i>pharaonis</i>  | R19125 | Piece of main branch with short branchlets coming off at a common branch on one side but not other, four branchlets intact, another branchlet broken towards its tip, overall length of 30mm                                             | 7, 12      | Scattered, one size, not touching, round openings                                                                            | Corallite walls costate, intercorallite walls reticulate                                                                                |
| <i>muricata</i>    | <i>muricata</i>   | R29687 | Section of horizontal branch with one short branchlet and another incipient branchlet, overall length of 35mm                                                                                                                            | 7, 8       | Quite abraded, no well formed rc, suggest round opening with lip,                                                            | Walls costate, intercorallite reticulate/partially costate                                                                              |
| <i>muricata</i>    | <i>pharaonis</i>  | R54837 | Long broken fragment with seven broken branches coming off indicating multiple branch growth, overall length of 35mm                                                                                                                     | 5, 6       | Mixture of large and small sizes, mostly not touching some evidence of lip, type of rc not discernable                       | Rc walls costate, intercorallite walls reticulate                                                                                       |
| <i>muricata</i>    | <i>pharaonis</i>  | R54838 | Fragment of branch with five branches and one incipient branch arising from a join area, overall length of 35mm                                                                                                                          | 6, 7, 8    | Mixed sizes, mostly not touching, severely abraded                                                                           | No rc walls discernable, reticulate intercorallite coenosteum                                                                           |
| <i>muricata</i>    | <i>pharaonis</i>  | R54839 | Arborescent based on three broken branches, overall length of 36mm                                                                                                                                                                       | 4, 5, 7, 8 | Mixture of sizes, mostly not touching, some evidence of lip, type of rc not discernable                                      | Rc walls costate, intercorallite walls reticulate                                                                                       |
| <i>muricata</i>    | <i>pharaonis</i>  | R54913 | Fragment of main branch, six branchlets evenly distributed on one side, appear to be evenly distributed on one side, appear to be short branchlets with only one ring of radial corallites, overall length of 30mm                       | 11         | Mixed sizes, mostly not touching, apparently tubular appressed on the branchlets , either immersed or exert between branches | Rc wall costate, costate broken or reticulate in intercorallite quite abraded                                                           |
| <i>muricata</i>    | <i>pharaonis</i>  | R54914 | Forked fragment with two broken chances which are apparently mostly complete, each of this form another branch, overall length of 19mm                                                                                                   | 7, 13      |                                                                                                                              | Severely abraded                                                                                                                        |

|                                      |                   |                      |                                                                                                                                          |                     |                                                                                                                                                                                        |                                                                        |
|--------------------------------------|-------------------|----------------------|------------------------------------------------------------------------------------------------------------------------------------------|---------------------|----------------------------------------------------------------------------------------------------------------------------------------------------------------------------------------|------------------------------------------------------------------------|
| <i>robusta</i>                       | <i>robusta</i>    | 49583<br>two pieces  | Joint with seven broken branches, overall length of 55mm, small fragment of branch, clearly similar to big piece, overall length of 21mm | 4, 21               | At least three rc are almost complete, tubular appressed with costate walls, corallites are very worn in most places, two sizes four discernable, tubular appressed with costate walls | Intercorallite areas reticulate                                        |
| <i>robusta</i>                       | <i>robusta</i>    | R2339                | Portion of densely branching section with short branchlets coming off, overall length of 23mm                                            |                     | Densely arranged and touching, one section include elongate partially appressed corallites with costate walls, two sizes, but not absolutely clear                                     |                                                                        |
| <i>aspera</i>                        | <i>aspera</i>     | R2209b               | Two branches (broken) indicating most likely arborescent growth, overall length of 24mm                                                  | 6                   | Two sizes                                                                                                                                                                              | Indications of reticulate intercorallite coenosteum                    |
| <i>aspera</i>                        | <i>aspera</i>     | R45678               | Indications of arborescent branching, overall length of 33mm                                                                             | 7                   | Two sizes                                                                                                                                                                              | Indications of reticulate intercorallite coenosteum                    |
| <i>aspera</i>                        | <i>aspera</i>     | R54847               | Evidence of four broken branches, overall length of 28mm                                                                                 | 5, 6                | Two sizes                                                                                                                                                                              | Evidence of costate radial wall & reticulate intercorallite coenosteum |
| <i>aspera</i>                        | <i>aspera</i>     | R2209c               | Apparently arborescent fragment with one broken branch coming off, overall length of 30mm                                                | 6, 8                | Two sizes, mostly not touching                                                                                                                                                         | Rc wall severely abraded, coenosteum difficult to interpret            |
| <i>hyacinthus</i>                    | <i>hyacinthus</i> | R18265               | Four short branchlets recognisable from terminal corallite, overall length of 25mm                                                       | 5                   | Rosette-like arrangement, evidence of appressed rc with large round openings consistent with the presence of a rounded lip                                                             | Radial corallite walls costate, reticulate interradiial coenosteum     |
| <i>aspera</i>                        | <i>aspera</i>     | R54842               | Joint area with seven branches coming off from common branch, all broken off at their base, overall length of 36mm                       | 5, 7, 13            | Two sizes or mixed sizes, one corallite only indicates appressed tubular with rounded opening, all others severely abraded, mostly not touching                                        | Rc wall costate, reticulate intercorallite coenosteum                  |
| <i>latistella</i>                    | <i>aculeus</i>    | R54844               | One branch embedded in the tissues of another coral appearance of a branchlet from a corymbose colony, overall length of 43mm            | 7                   | Well preserved, partly appressed, tubular with round opening                                                                                                                           | Corallite walls costate, intercorallite areas reticulate or a line of  |
| <i>cervicornis</i>                   | <i>prolifera?</i> | R52067               |                                                                                                                                          |                     |                                                                                                                                                                                        |                                                                        |
| <i>Dendracis</i> not <i>Acropora</i> |                   | R49389               | No axial corallite, overall length of 19mm                                                                                               |                     |                                                                                                                                                                                        |                                                                        |
| unidentified                         | unidentified      | R19126               | Small piece, possibly basal without central axis, possibly <i>Dendracis</i> , overall length of 15mm                                     |                     | One size, round opening and immersed                                                                                                                                                   |                                                                        |
| unidentified                         | unidentified      | R28205               | Small forked fragment, one part of fork maybe forming three branchlets, overall length of 19mm                                           | 4                   | Very abraded, mostly not touching                                                                                                                                                      |                                                                        |
| unidentified                         | unidentified      | R40720               | Three small fragments, each just a portion of a branch but very similar, overall length of 13mm, 5mm                                     |                     | Abraded, not touching                                                                                                                                                                  |                                                                        |
| unidentified                         | unidentified      | R40721               | Small, abraded pieces 4mm length                                                                                                         |                     |                                                                                                                                                                                        |                                                                        |
| unidentified                         | unidentified      | R52051               | Short piece of small branch with three broken branchlets coming off, overall length of 16mm                                              | 5                   | Very abraded, corallites approximately same size                                                                                                                                       | No corallite available to indicate characters                          |
| unidentified                         | unidentified      | R54848               | Fragment with multiple branching, apparently corymbose, six branches discernable, two apparently incipient, overall length of 28mm       | 6, 7, 8             | Two sizes                                                                                                                                                                              | Entire fragment too abraded to discern structure                       |
| unidentified                         | unidentified      | R54915               | Section of forked branch with second fork at tip with three broken branch ends, overall length of 25mm                                   | 7                   | Very abraded, apparently scattered and mostly not touching                                                                                                                             |                                                                        |
| unidentified                         | unidentified      | R1920<br>five pieces | Five fragments, may be different species, lengths of 13mm, 15mm, 15mm, 17mm, 20mm                                                        | 5, 5, 4, 4, 7 resp. |                                                                                                                                                                                        |                                                                        |
| unidentified                         | unidentified      | R52066               | Fragment of a branch, slender, overall length of 13mm                                                                                    | 4                   | Mixed sizes, possibly larger size in line, shape cannot be discerned                                                                                                                   | Severely abraded                                                       |
